# Supplementary material for: Circular RNA UBAP2 promotes the proliferation of prostate cancer cells via the miR-1244/MAP3K2 axis
Source: PubMed Central journal article supplement — Oncol Lett. 2021 Apr 21;21(6):486. doi: 10.3892/ol.2021.12747 (PMC8100954; doi:10.3892/ol.2021.12747), 2021-04-21

Figure S1. circUBAP2 expression was inhibited by miR-1244 overexpression, but was promoted by miR-1244 inhibition. \*\*\*P<0.001 vs. control. circUBAP2, circular RNA UBAP2; miR, microRNA.

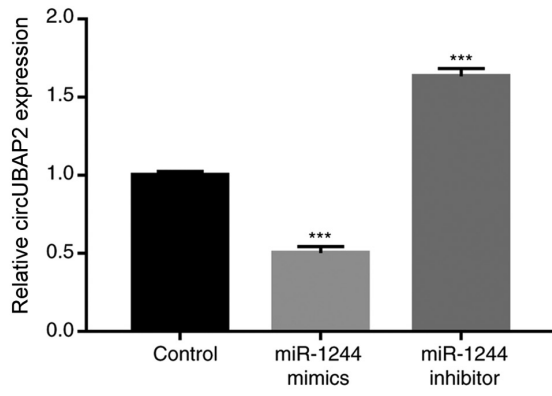

Figure S2. Transfection efficiency of miR-1244 mimics and inhibitor. (A) miR-1244 mimics significantly increased miR-1244 expression in all four PCa cell lines compared with NC. (B) miR-1244 inhibitor significantly decreased miR-1244 expression in all four PCa cell lines compared with NC. \*\*\* $P < 0.001$  vs. NC. miR, microRNA; PCa, prostate cancer; NC, negative control, untransfected cells.

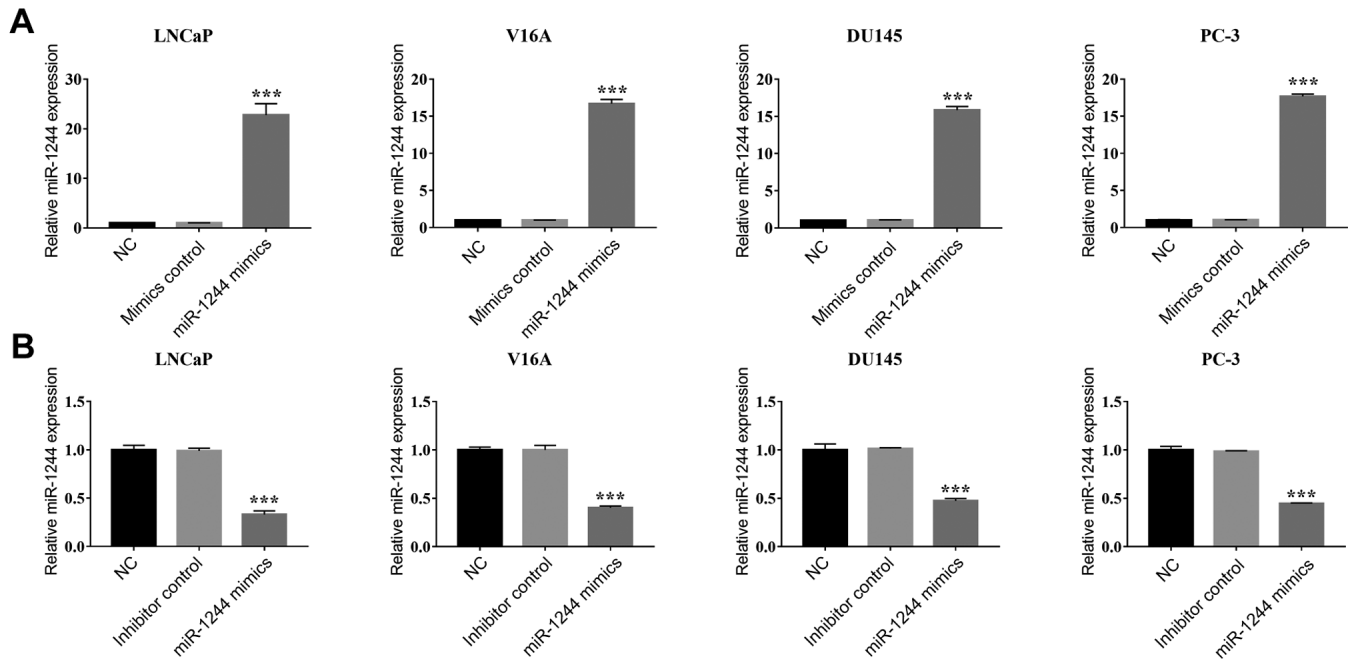

Supplement: Supplementary_Data.pdf [file Supplementary_Data.pdf]
